# Supplementary material for: Effects of extracts from various parts of invasive Solidago species on the germination and growth of native grassland plant species
Source: PeerJ journal article supplement (doi:10.7717/peerj.15676), 2023-07-28

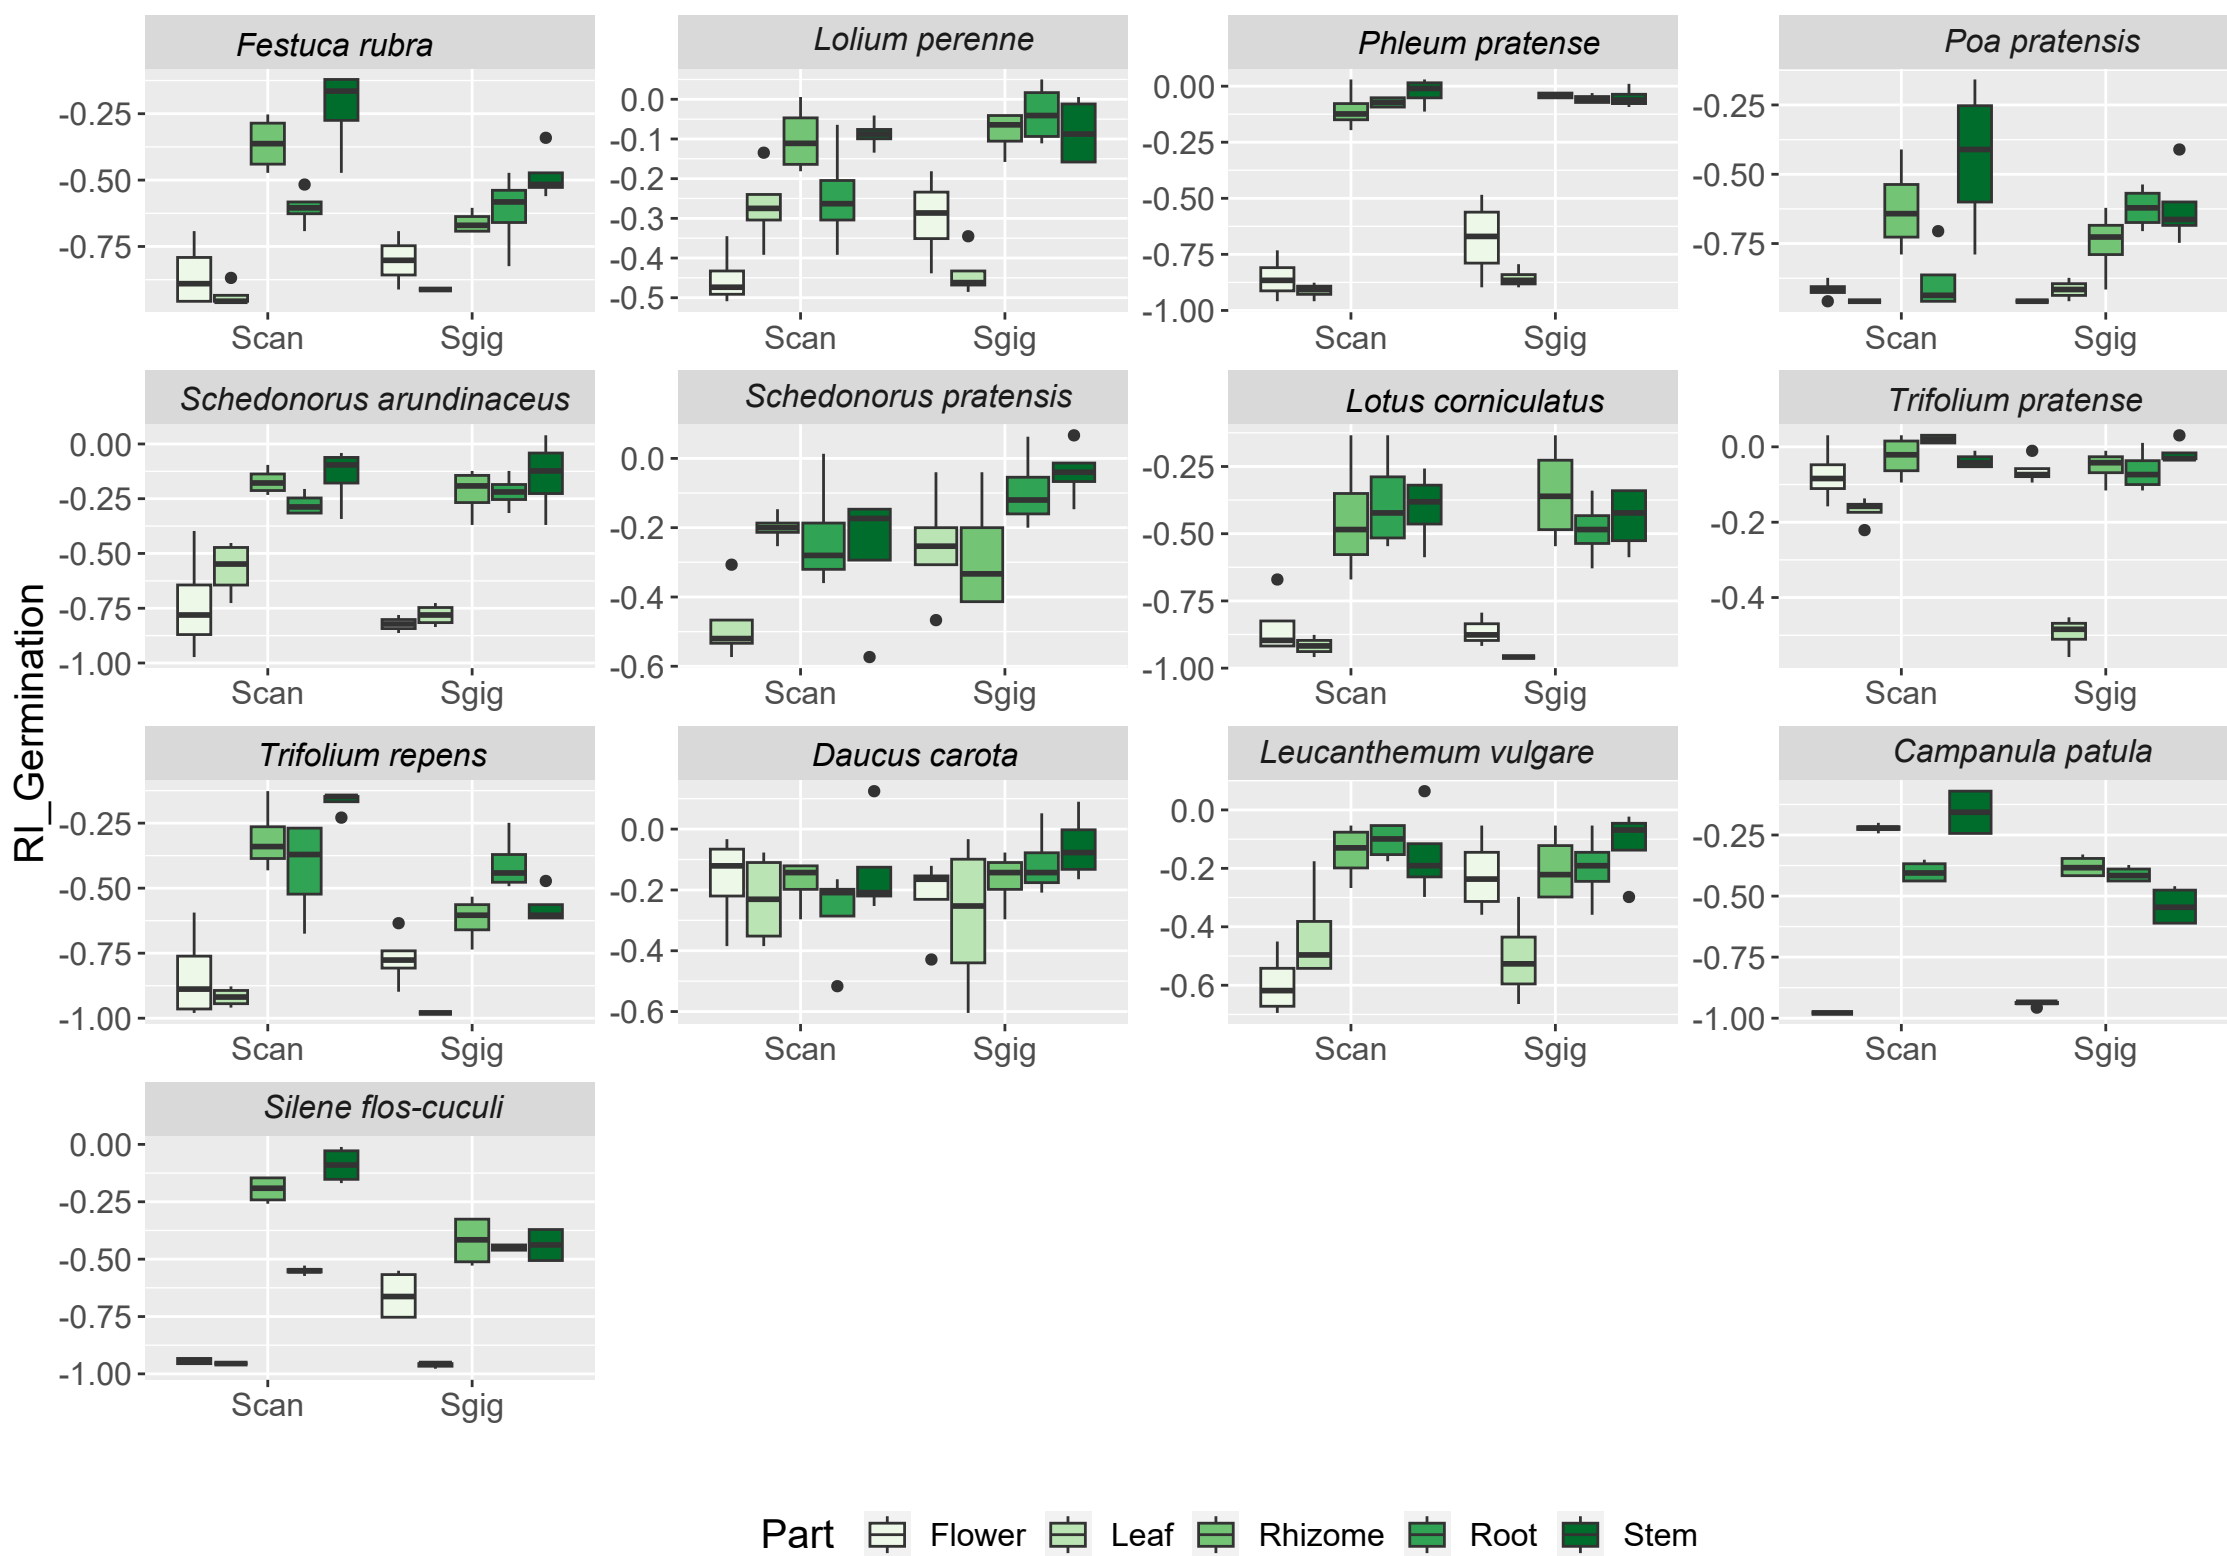

Supplement: FigureS4.pdf [file FigureS4.pdf]
